# Supplementary material
Source: publisher figshare collection journal article supplement (https://acs.figshare.com/ndownloader/files/17868470)
Supplement: Supplementary file 1 [file 17868470]

*Supporting Information for*

**Universal Gas-Uptake Behavior of a Zeolitic Imidazolate Framework ZIF-8 at High Pressure**

**Jinhyuk Choi,<sup>1</sup> Junhyuck Im,<sup>1</sup> Kyungkyou Noh,<sup>2</sup> Jaheon Kim,<sup>2,3</sup> Thomas Vogt,<sup>4</sup>  
Yongjae Lee<sup>5,\*</sup>**

<sup>1</sup>Department of Earth System Sciences, Yonsei University, Seoul 03722, Republic of Korea

<sup>2</sup>Department of Chemistry, Soongsil University, Seoul 06978, Republic of Korea

<sup>3</sup>Department of ICMC Convergence Technology, Soongsil University, Seoul 06978, Republic of Korea

<sup>4</sup>NanoCenter and Department of Chemistry & Biochemistry, University of South Carolina, Columbia, South Carolina 29208, United States

<sup>5</sup>Center for High Pressure Science & Technology Advanced Research (HPSTAR), Shanghai 201203, China

**Corresponding Author**

\*Email: yongjaelee@yonsei.ac.kr, Tel.: +82-2-2123-5667

|    |                               |
|----|-------------------------------|
| 20 | <b>Contents</b>               |
| 21 | Part I. Supplementary Figures |
| 22 | Part II. Supplementary Tables |

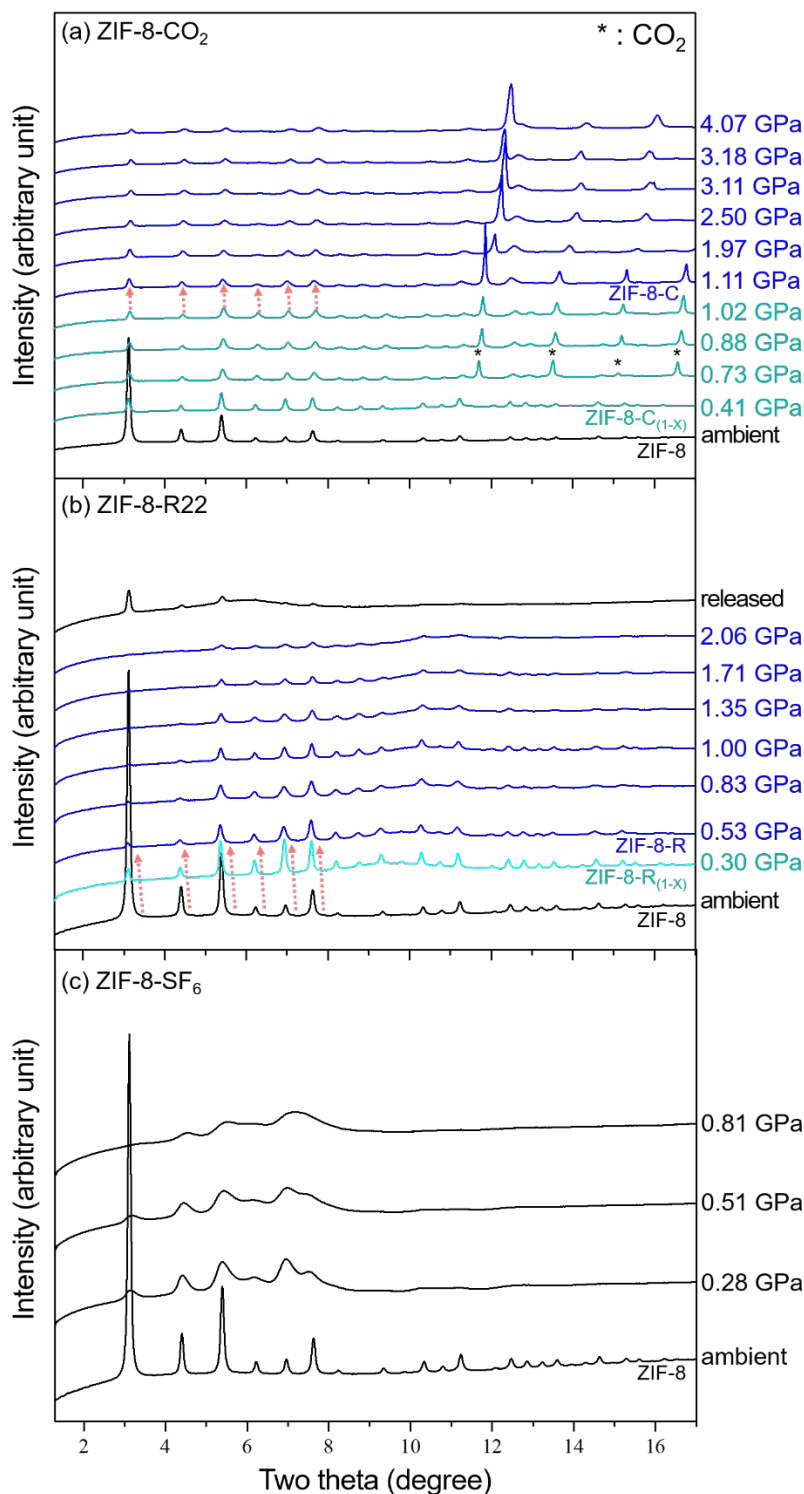

24

25 **Figure S1.** Diffraction patterns of ZIF-8 at high pressures. ZIF-8-PII denotes a state where pressure-induced  
 26 insertion (PII) of the different gases (C: CO<sub>2</sub>, R: R22, S: SF<sub>6</sub>) is saturated, whereas the subscript (1-x) denotes a  
 27 stage where PII is in progress. Note ZIF-8 compressed with SF<sub>6</sub> shows peak broadening at relatively low  
 28 pressures compared to those compressed with CO<sub>2</sub> and R22.

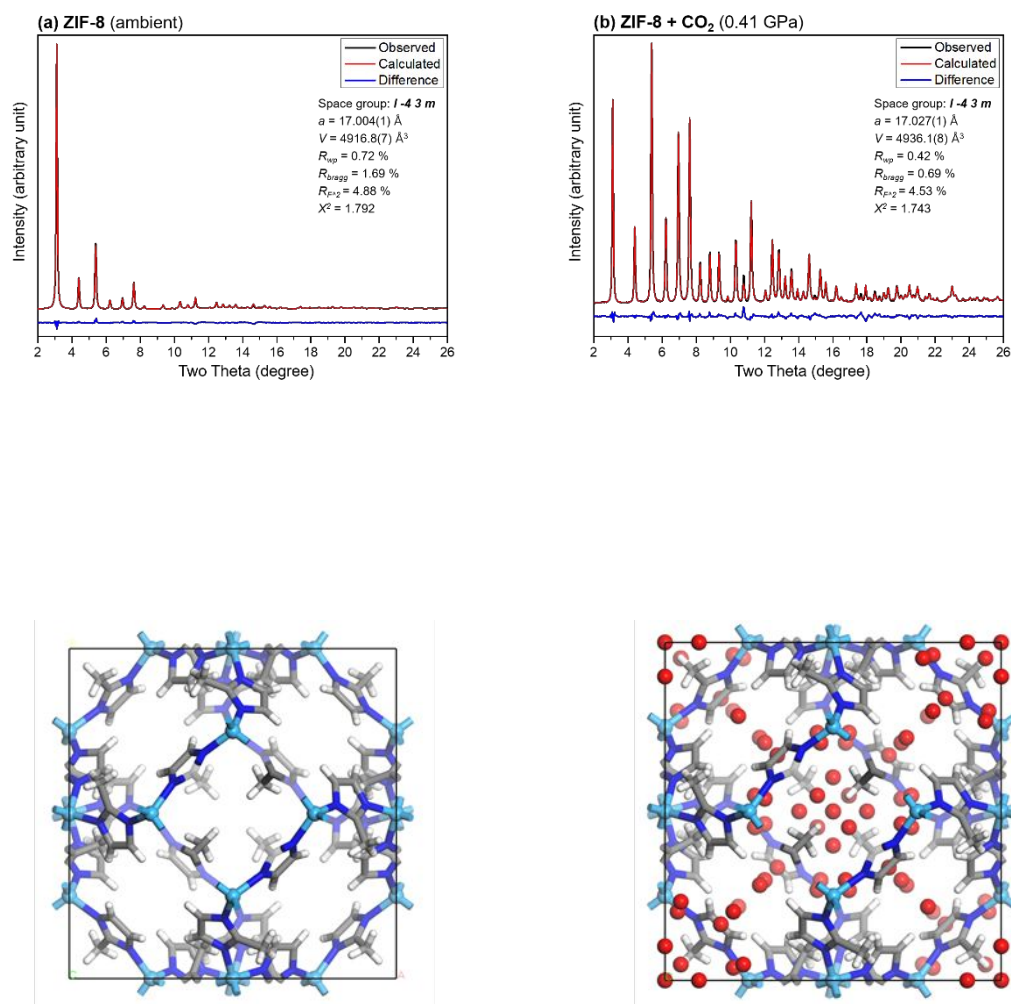

**Figure S2.** Rietveld fits of ZIF-8 at different pressures in CO<sub>2</sub> pressure medium with respective structural models using oxygen dummy atoms. (a) ambient, (b) 4.1 kbar, (c) 7.3 kbar, (d) 8.8 kbar, (e) 10.2 kbar, (f) 11.1 kbar, (g) 19.7 kbar, (h) 25.0 kbar, (i) 31.1 kbar, (j) 31.8 kbar, (k) 40.7 kbar.

Figure S2. (continued)

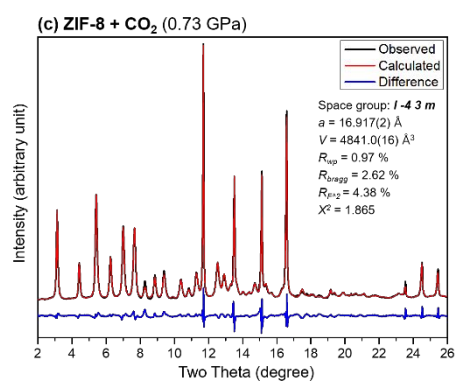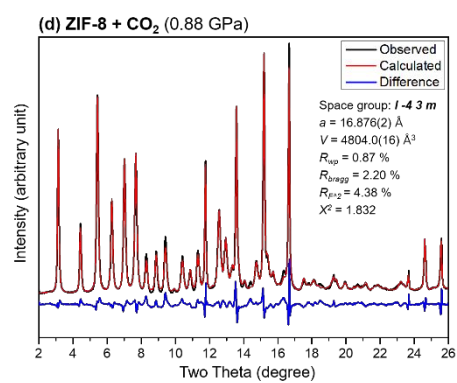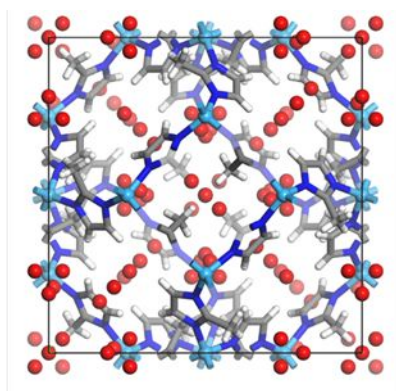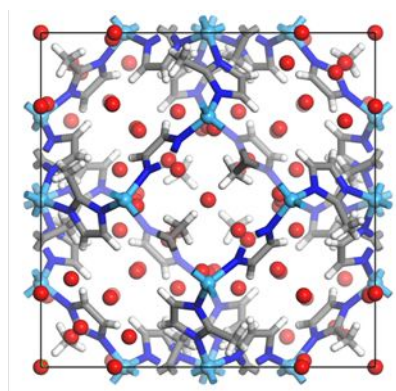

Figure S2. (continued)

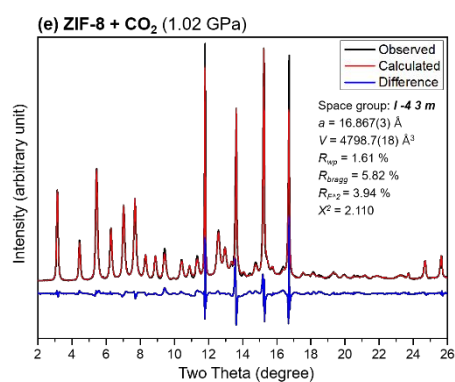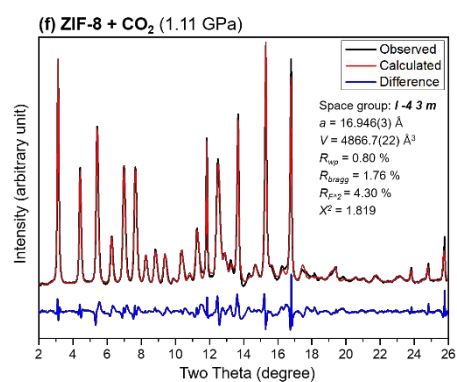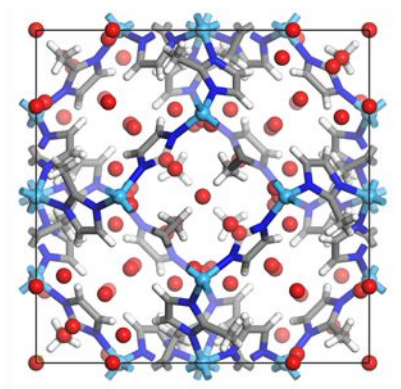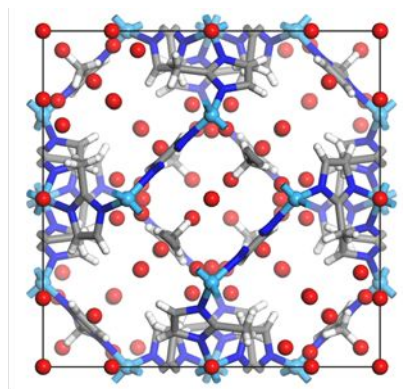

Figure S2. (continued)

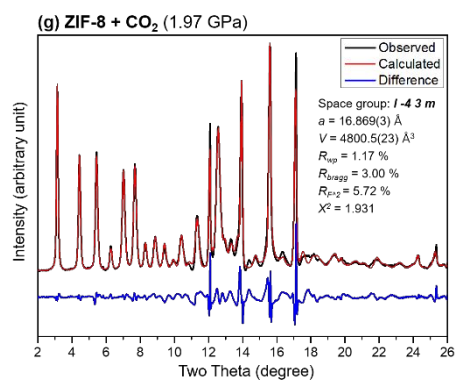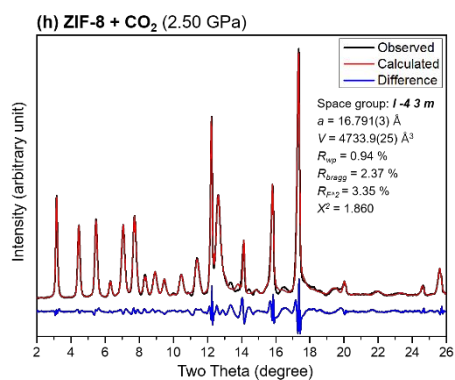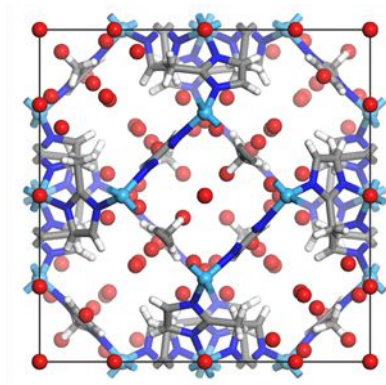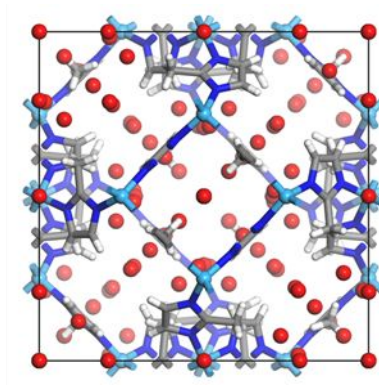

Figure S2. (continued)

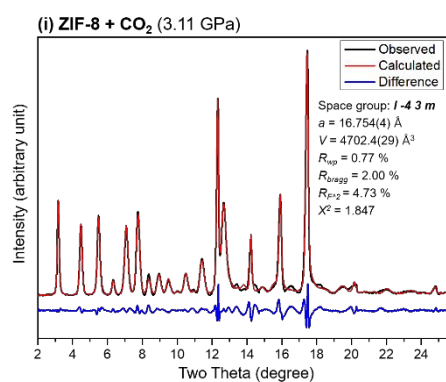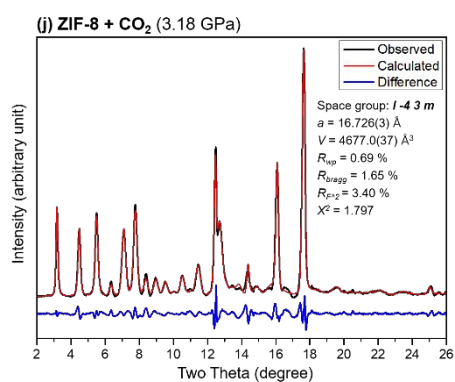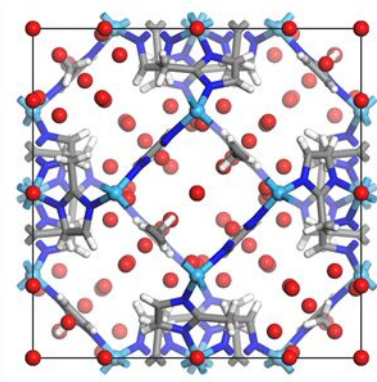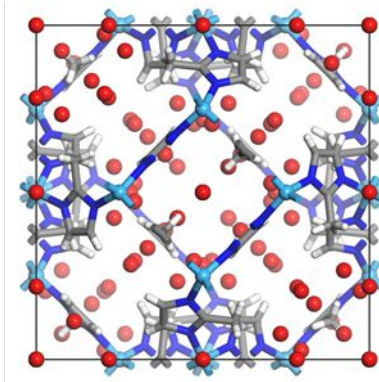



Figure S2. (continued)

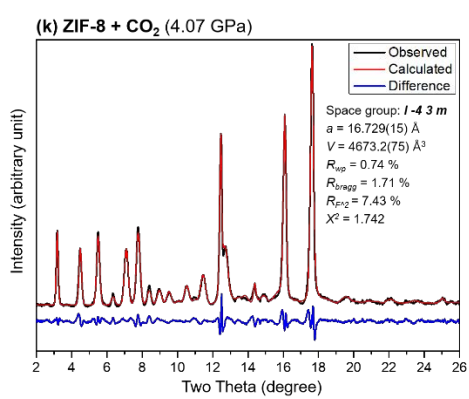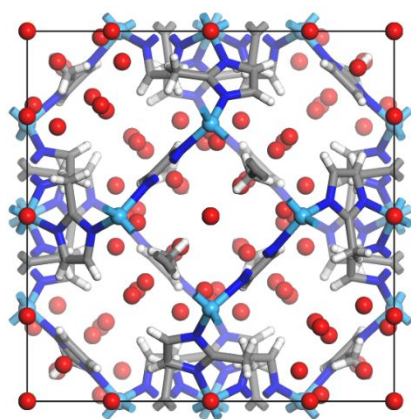

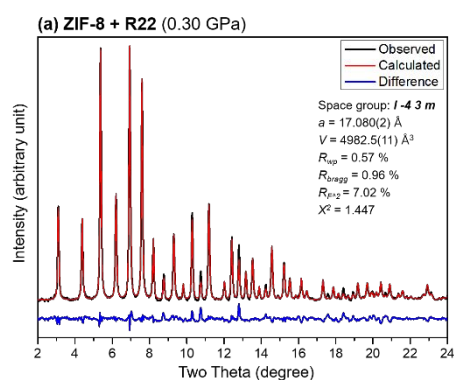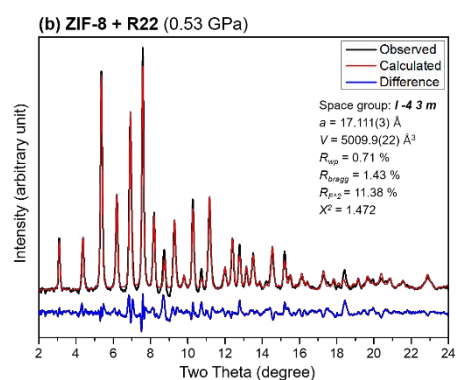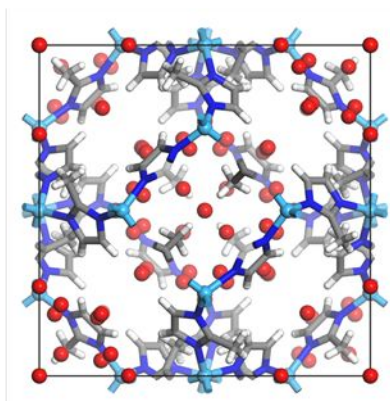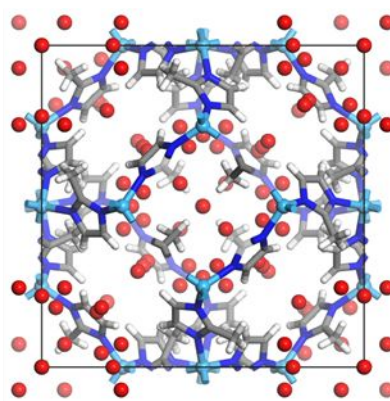

**Figure S3.** Rietveld fits of ZIF-8 at different pressures in R22 pressure medium with respective structural models using oxygen dummy atoms. (a) 3.0 kbar, (b) 5.3 kbar, (c) 8.3 kbar, (d) 10.0 kbar, (e) 13.5 kbar, (f) 17.1 kbar, (g) 20.6 kbar.

Figure S3. (continued)

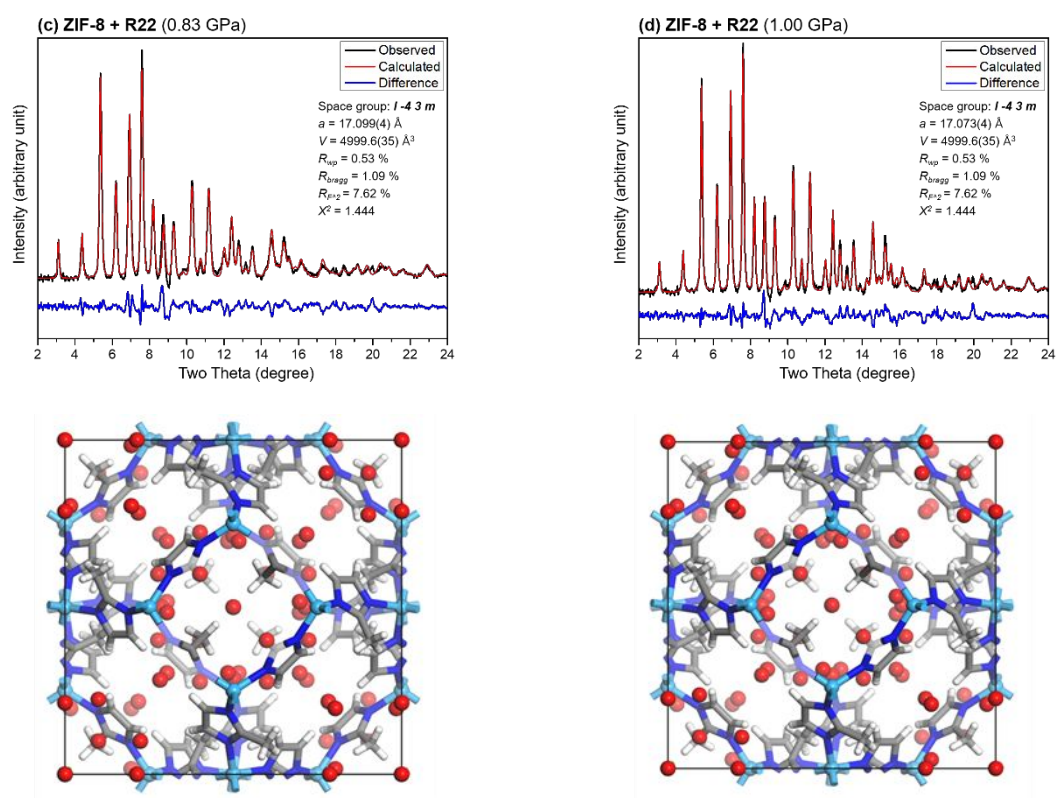

Figure S3. (continued)

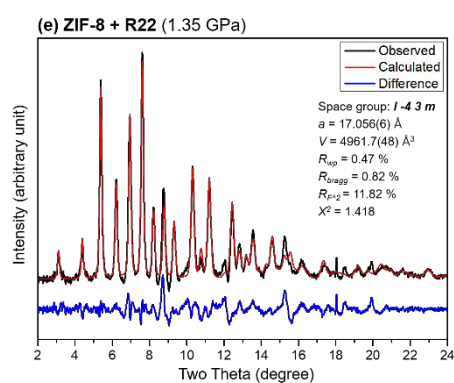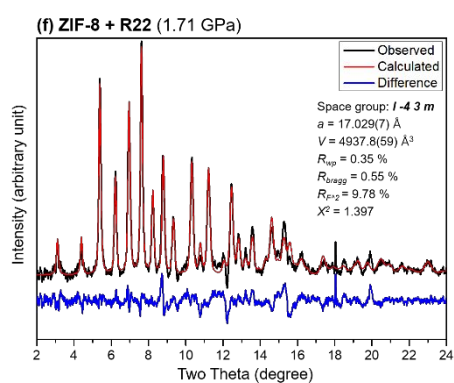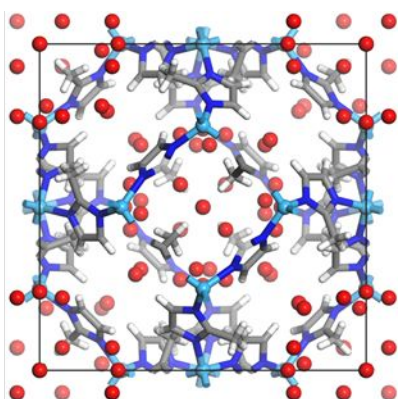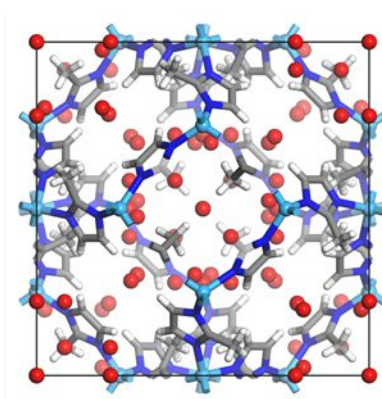

Figure S3. (continued)

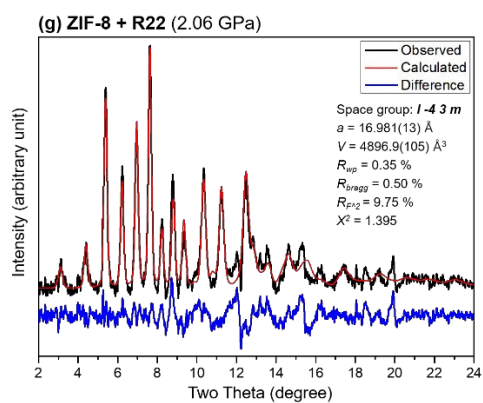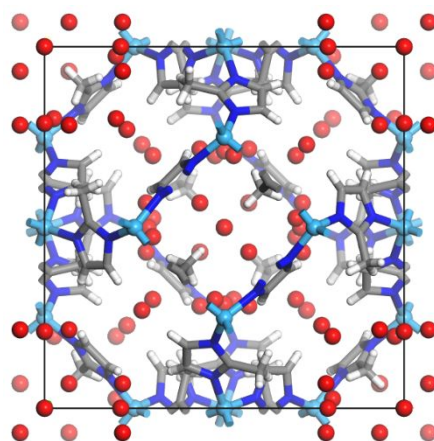

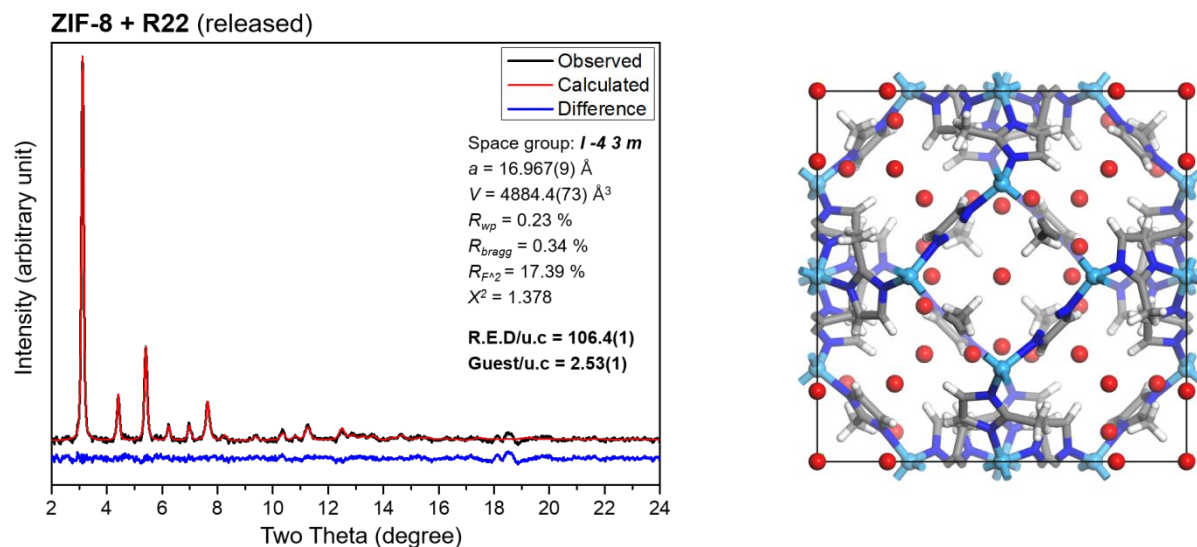

**Figure S4.** A Rietveld fit and structure model of pressure-released ZIF-8 after compression in the presence of R22. Based on the residual electron density, the number of R22 molecules contained per unit cell is estimated to 2.53(1).

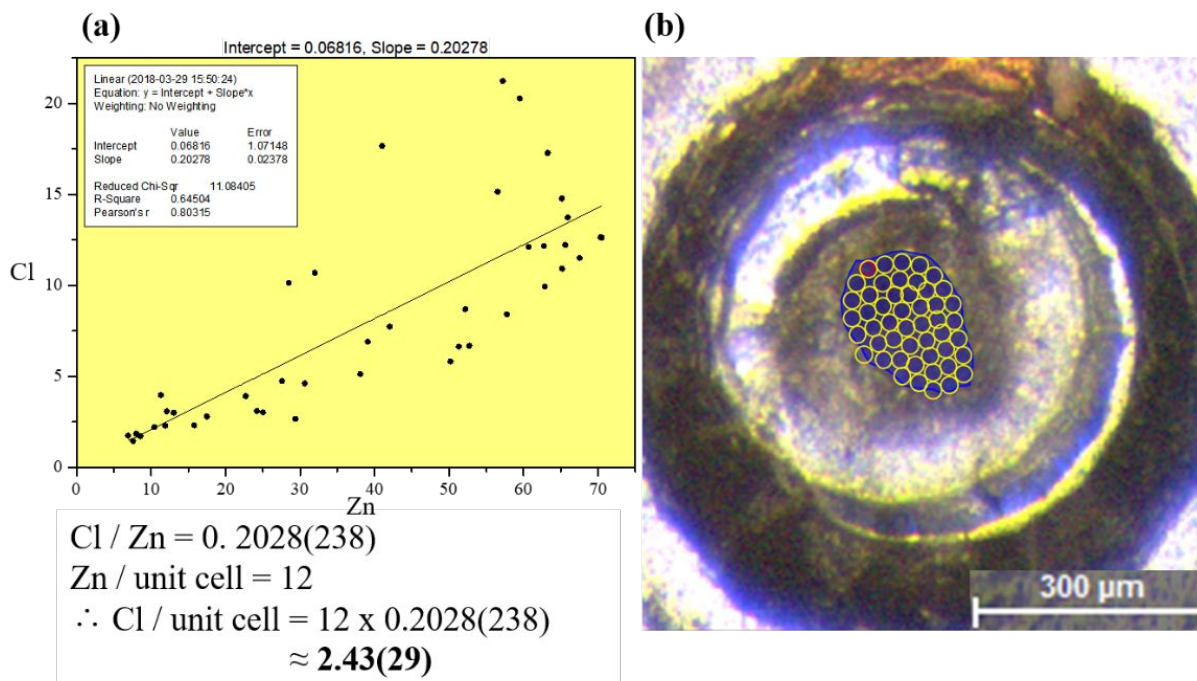

**Figure S5.** X-ray fluorescence spectroscopy of ZIF-8 after pressure release in the presence of R22. The number of residual R22 molecules are obtained from linear-fitting of the measured Cl/Zn counts. Total 49 points were scanned over the recovered ZIF-8 sample in the gasket hole, and 41 points that were not disturbed by stainless-steel gasket surrounding the sample were used for analysis. The Cl to Zn ratio at each point was linearly fitted to give 2.4(1) R22 molecules per unit cell, which agrees with the Rietveld result (Fig. S4). (a) The result of the linear fit of Cl/Zn counts. (b) An image of the recovered sample with yellow circles indicating XRF probed regions.



232  
233  
234

(a) ZIF-8 + CO<sub>2</sub> (0.73 GPa)

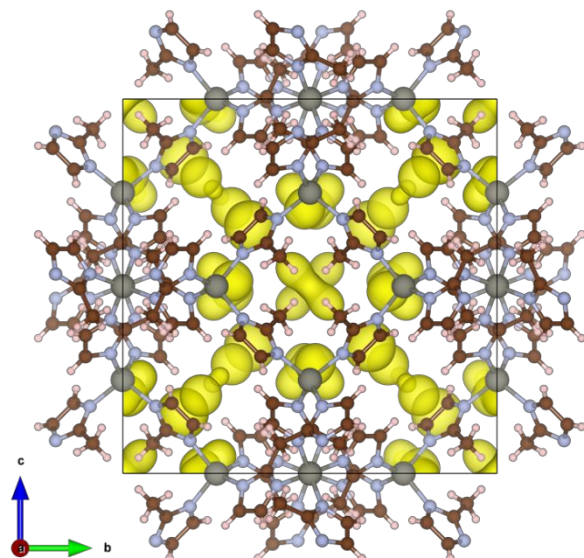

(b) ZIF-8 + CO<sub>2</sub> (1.11 GPa)

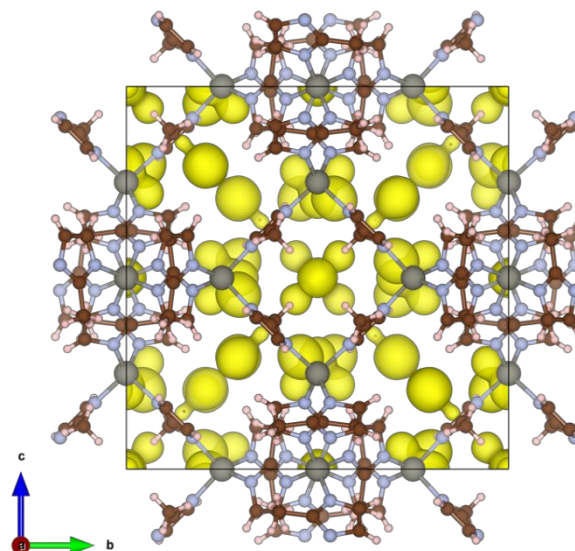

235

(c) ZIF-8 + R22 (0.83 GPa)

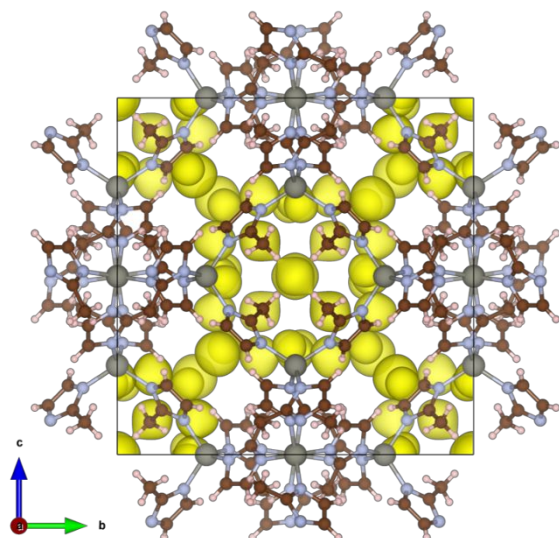

(d) ZIF-8 + R22 (2.06 GPa)

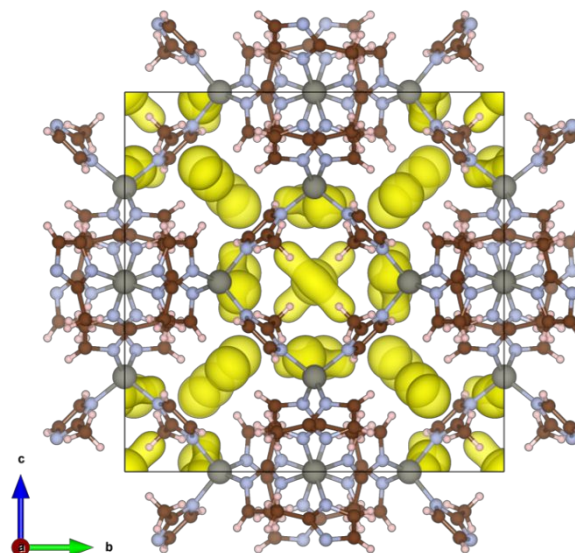

236

237 **Figure S6.** Electron density maps calculated from Rietveld refinement. Changes in ZIF-8 framework is  
238 accompanied by changes in electron density distribution with increasing pressure. The unit cells are viewed  
239 along [100] direction. Note the incomplete pore opening of ZIF-8 compressed up to 20.6 kbar with R22,  
240 compared to ZIF-8 at 11.1 kbar in CO<sub>2</sub> PTM.

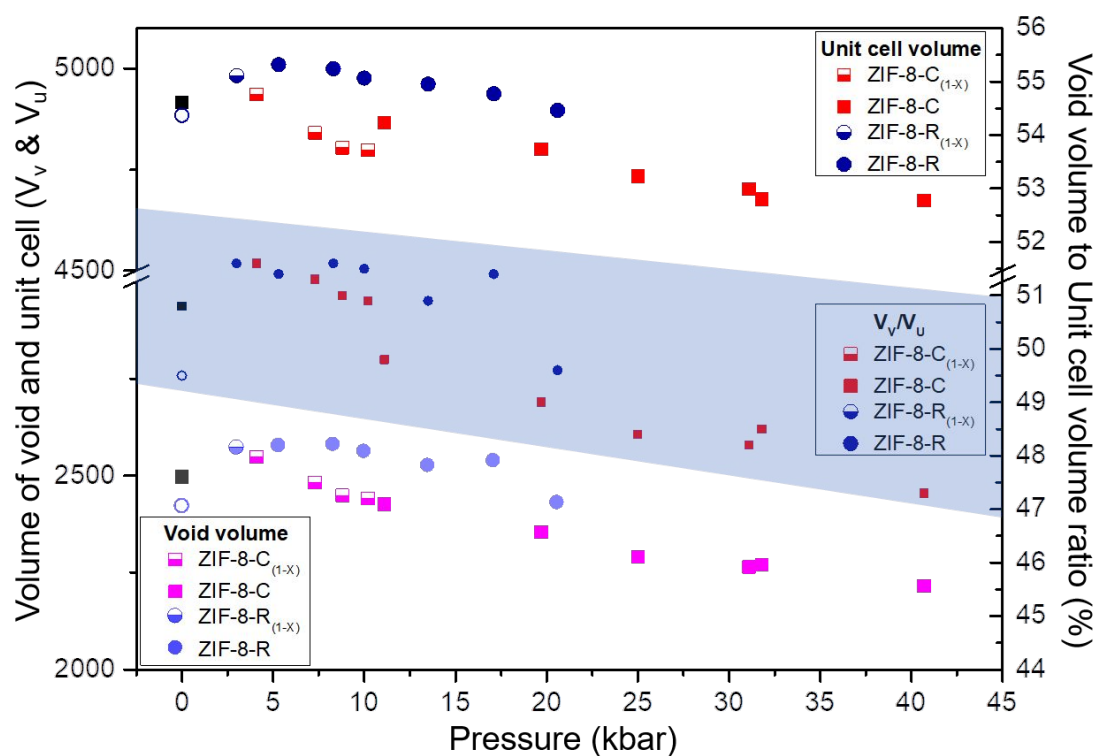

**Figure S7.** Unit cell and void volumes of ZIF-8 as a function of pressure. The data points within the blue-shaded envelope show the ratio of void and unit cell volumes in percent. Note that the void to unit cell volume ratio decreases with increasing pressure.



267  
268

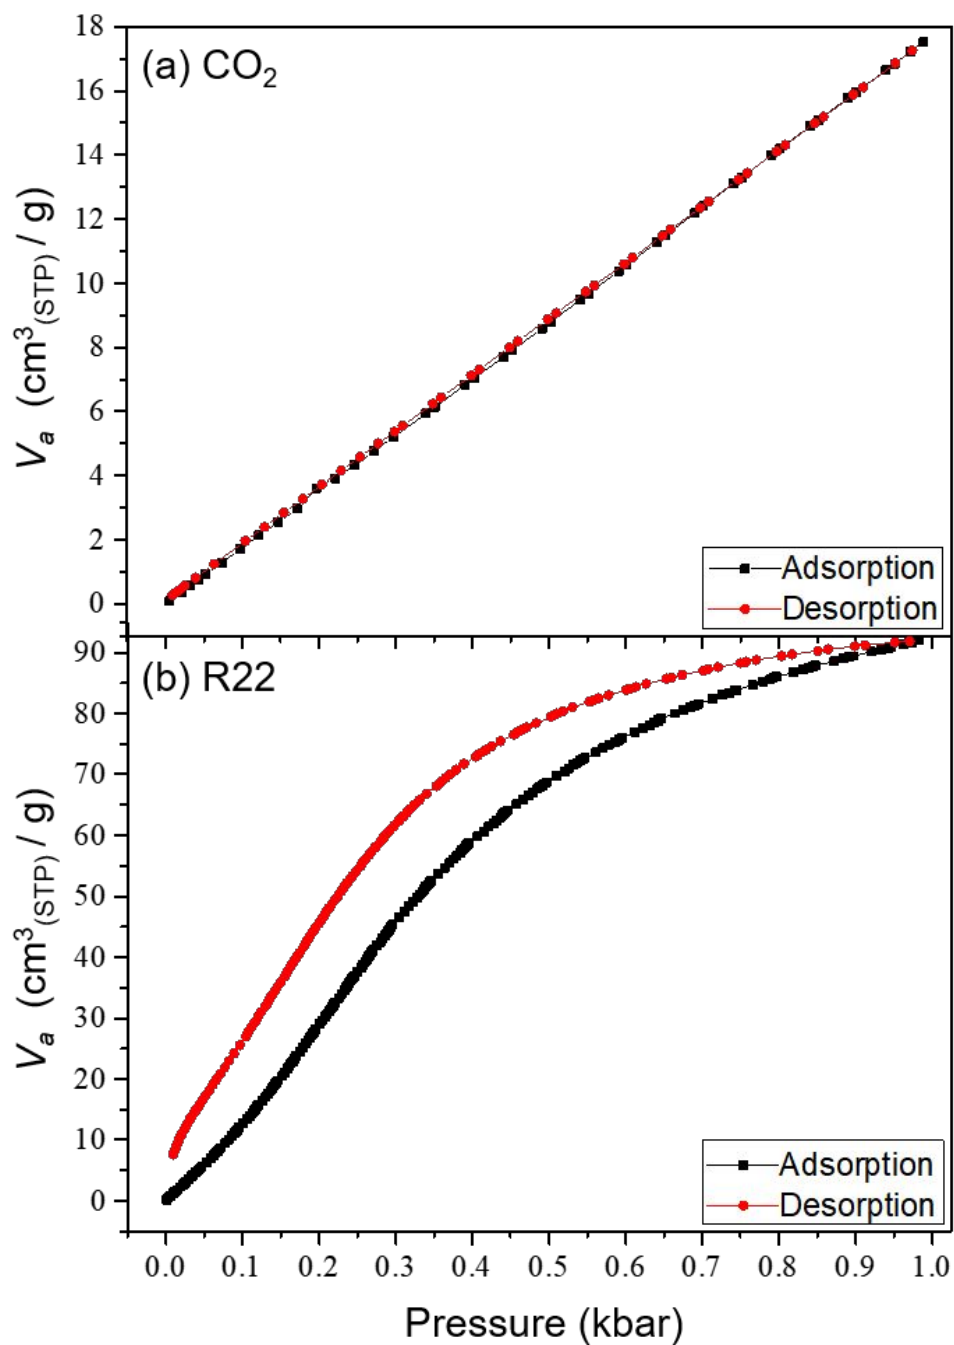

269

270 **Figure S8.** Adsorption/desorption isotherms of ZIF-8 under (a) CO<sub>2</sub> and (b) R22 atmospheres. The amount  
271 adsorbed is estimated by the gas volume at standard conditions ( $V_a$ ). Note that R22 shows a higher degree of  
272 hysteresis and a certain amount of remnant gas after desorption, indicating its higher interaction with the  
273 framework compared to CO<sub>2</sub>.

274  
275

## PART II. Supplementary Tables

**Table S1.** Framework and pore data for ZIF-8 under CO<sub>2</sub> PTM

| Pressure [kbar] | Unit cell Volume ( $V_U$ ) [ $\text{\AA}^3$ ] | Void Volume ( $V_V$ ) [ $\text{\AA}^3$ ] <sup>[a]</sup> | $V_V/V_U$ [%] | Torsion angle [ $^\circ$ ] <sup>[b]</sup> | Electron Count <sup>[c]</sup> | CO <sub>2</sub> molecules |
|-----------------|-----------------------------------------------|---------------------------------------------------------|---------------|-------------------------------------------|-------------------------------|---------------------------|
| 0               | 4917(1)                                       | 2539                                                    | 50.8          | 60.0                                      | 0                             | 0                         |
| 4.1             | 4936(1)                                       | 2571                                                    | 51.6          | 58.9                                      | 882                           | 40.1                      |
| 7.3             | 4841(2)                                       | 2500                                                    | 51.3          | 60.2                                      | 1003                          | 45.6                      |
| 8.8             | 4804(2)                                       | 2445                                                    | 51.0          | 60.2                                      | 1042                          | 47.4                      |
| 10.2            | 4799(2)                                       | 2468                                                    | 50.9          | 60.3                                      | 1072                          | 48.7                      |
| 11.1            | 4867(3)                                       | 2524                                                    | 49.8          | 84.4                                      | 1167                          | 53.0                      |
| 19.7            | 4801(3)                                       | 2498                                                    | 49.0          | 85.1                                      | 1230                          | 55.9                      |
| 25.0            | 4734(3)                                       | 2410                                                    | 48.4          | 86.8                                      | 1231                          | 56.0                      |
| 31.1            | 4702(3)                                       | 2388                                                    | 48.2          | 86.5                                      | 1232                          | 56.0                      |
| 31.8            | 4677(4)                                       | 2356                                                    | 48.5          | 85.5                                      | 1233                          | 56.1                      |
| 40.7            | 4673(8)                                       | 2350                                                    | 47.3          | 83.2                                      | 1234                          | 56.1                      |

[a] Calculated using *Mercury CSD 3.10.3* with a probe radius of 1.2  $\text{\AA}$ . [b] The angle between mean plane of imidazolate and crystallographic (100) plane.

[c] Obtained from Rietveld refinement.

**Table S2.** Framework and pore data for ZIF-8 under R22 PTM

| Pressure [kbar] | Unit cell Volume ( $V_U$ ) [ $\text{\AA}^3$ ] | Void Volume ( $V_V$ ) [ $\text{\AA}^3$ ] <sup>[a]</sup> | $V_V/V_U$ [%] | Torsion angle [ $^\circ$ ] <sup>[b]</sup> | Electron Count <sup>[c]</sup> | R22 molecules |
|-----------------|-----------------------------------------------|---------------------------------------------------------|---------------|-------------------------------------------|-------------------------------|---------------|
| 0               | 4917(1)                                       | 2539                                                    | 50.8          | 66.0                                      | 0                             | 0             |
| 3.0             | 4983(2)                                       | 2571                                                    | 51.6          | 61.2                                      | 926                           | 22.0          |
| 5.3             | 5010(3)                                       | 2576                                                    | 51.4          | 62.3                                      | 1053                          | 25.1          |
| 8.3             | 5000(4)                                       | 2579                                                    | 51.6          | 61.6                                      | 1068                          | 25.4          |
| 10.0            | 4977(3)                                       | 2561                                                    | 51.5          | 59.8                                      | 1070                          | 25.5          |
| 13.5            | 4962(5)                                       | 2524                                                    | 50.9          | 67.1                                      | 1084                          | 25.8          |
| 17.1            | 4938(6)                                       | 2537                                                    | 51.4          | 61.0                                      | 1083                          | 25.8          |
| 20.6            | 4897(11)                                      | 2428                                                    | 49.6          | 76.1                                      | 1084                          | 25.8          |
| 0 (released)    | 4884(8)                                       | 2419                                                    | 49.5          | 75.8                                      | 106                           | 2.53          |

[a] Calculated using *Mercury CSD 3.10.3* with a probe radius of 1.2  $\text{\AA}$ . [b] The angle between mean plane of imidazolate and crystallographic (100) plane.

[c] Obtained from Rietveld refinement.
